# Supplementary material
Source: ML conference proceedings conference paper supplement (https://proceedings.neurips.cc/paper_files/paper/2019/hash/b87517992f7dce71b674976b280257d2-Abstract.html)
Supplement: Supplementary file [file b87517992f7dce71b674976b280257d2-Supplemental.zip]

---

# *Supplementary Material for* **3D Object Detection from a Single RGB Image via Perspective Points**

---

**Anonymous Author(s)**

Affiliation

Address

email

## 1 **3D Object Detection**

Here, we report the 3D object detection results of all 30 object categories in Table 1.

Table 1: 3D object detection on SUN RGB-D.

|        |             |             |             |        |            |          |       |       |           |              |
|--------|-------------|-------------|-------------|--------|------------|----------|-------|-------|-----------|--------------|
| toilet | recycle_bin | night_stand | endtable    | drawer | computer   | keyboard | table | chair | monitor   | stool        |
| 81.22  | 37.68       | 35.16       | 19.77       | 1.28   | 1.24       | 2.86     | 44.12 | 40.42 | 1.14      | 22.65        |
| lamp   | dresser     | picture     | garbage_bin | shelf  | sofa_chair | cabinet  | sink  | desk  | bookshelf | coffee_table |
| 13.14  | 27.38       | 0           | 22.42       | 0.97   | 51.86      | 1.70     | 41.35 | 20.19 | 8.29      | 28.80        |
| box    | sofa        | whiteboard  | bed         | pillow | paper      | painting | cpu   | mAP   |           |              |
| 1.64   | 62.35       | 0.02        | 79.69       | 11.36  | 0          | 0.17     | 21.60 | 22.69 |           |              |

2
